# Supplementary material for: Deciphering a unique biotin scavenging pathway with redundant genes in the probiotic bacterium Lactococcus lactis
Source: PubMed Central journal article supplement (PMC4861984; doi:10.1038/srep25680), 2016-05-10
Supplement: srep25680-s1.pdf [file srep25680-s1.pdf]

## Supplementary Information for

### Deciphering a unique biotin scavenging pathway with redundant genes in the probiotic bacterium *Lactococcus lactis*

Huimin Zhang<sup>1,4#</sup>, Qingjing Wang<sup>1#</sup>, Derek J. Fisher<sup>2</sup>, Mingzhu Cai<sup>1</sup>, Vandana Chakravartty<sup>3</sup>, Huiyan Ye<sup>1</sup>, Ping Li<sup>1</sup>, Jose O. Solbiati<sup>4</sup>, Youjun Feng<sup>1\*</sup>

<sup>1</sup>Department of Medical Microbiology and Parasitology, Zhejiang University School of Medicine, Hangzhou, Zhejiang 310058, PR China

<sup>2</sup>Department of Microbiology, Southern Illinois University, Carbondale, IL 62901, USA

<sup>3</sup>Department of Microbiology, University of Illinois, Urbana, IL 61801, USA

<sup>4</sup>Institute for Genomic Biology, University of Illinois, Urbana, Illinois 61801, USA

# These authors contributed equally to this work.

\*To whom should be addressed: [fengyj@zju.edu.cn](mailto:fengyj@zju.edu.cn) (Y.F.)

**Table S1** Comparative analyses of the genes involved in lipid metabolism of *L. lactis* and *S. suis* 2

| Genes        | <i>S. suis</i> 05ZYH33 |      | <i>L. lactis</i> IL1403 |      |
|--------------|------------------------|------|-------------------------|------|
|              | Locus                  | GC % | Locus                   | GC % |
| Chromosome   | /                      | 41.1 | /                       | 35.3 |
| <i>birA1</i> | SSU05_1625             | 44.0 | L0191                   | 34.2 |
| <i>birA2</i> | /                      | /    | L0192                   | 34.4 |
| <i>bioY1</i> | SSU05_0509             | 40.6 | L24031                  | 35.4 |
| <i>bioY2</i> | /                      | /    | L1011                   | 37.5 |
| <i>pycA</i>  |                        |      | L63652                  | 38.1 |
| <i>accA</i>  | SSU05_1796             | 52.4 | L0190                   | 38.6 |
| <i>accB</i>  | SSU05_1801             | 53.1 | L0187                   | 38.7 |
| <i>accD1</i> | SSU05_1797             | 51.3 | L0180                   | 37.8 |
| <i>accD2</i> | SSU05_1798             | 42.9 | /                       | /    |
| <i>accC</i>  | SSU05_1799             | 49.2 | L0189                   | 39.0 |
| <i>fadA</i>  | /                      | /    | L25946                  | 36.3 |
| <i>fadB</i>  | /                      | /    | /                       | /    |
| <i>fadL</i>  | /                      | /    | /                       | /    |
| <i>fadD</i>  | /                      | /    | L54546                  | 37.3 |
| <i>fadE</i>  | /                      | /    | /                       | /    |
| <i>fabF</i>  | SSU05_1802             | 46.2 | L0186                   | 41.0 |
| <i>fabG1</i> | SSU05_1803             | 43.4 | L0185                   | 36.9 |
| <i>fabG2</i> | /                      | /    | L27694                  | 35.6 |
| <i>fabG3</i> | /                      | /    | L1530                   | 41.7 |
| <i>fabZ1</i> | SSU05_1800             | 45.5 | L160425                 | 34.9 |
| <i>fabZ</i>  | /                      | /    | L0188                   | 37.7 |
| <i>fabI</i>  | /                      | /    | L161132                 | 38.9 |
| <i>fabH</i>  | SSU05_1807             | 46.1 | L0182                   | 40.4 |
| <i>fabD</i>  | SSU05_1804             | 47.6 | L0184                   | 37.0 |
| <i>fabK</i>  | SSU05_1805             | 43.8 | /                       | /    |
| <i>acpP</i>  | SSU05_1806             | 37.4 | L0183                   | 36.0 |
| <i>acpD</i>  |                        |      | L115551                 | 36.1 |
| <i>acpH</i>  | /                      | /    | L186107                 | 36.5 |
| <i>fabT</i>  | SSU05_1808             | 39.1 | L180805                 | 35.3 |
| <i>fabM</i>  | SSU05_1809             | 43.2 | /                       | /    |
| <i>acpS</i>  | SSU05_1813             | 43.4 | L61355                  | 36.7 |
| <i>lplA</i>  | SSU05_1836             | 43.5 | L64373                  | 37.9 |
